# Supplementary material for: Targeting the Epigenetic Non-Coding RNA MALAT1/Wnt Signaling Axis as a Therapeutic Approach to Suppress Stemness and Metastasis in Hepatocellular Carcinoma
Source: PubMed Central journal article supplement (PMC7226390; doi:10.3390/cells9041020), 2020-04-20
Supplement: cells-09-01020-s001.pdf [file cells-09-01020-s001.pdf]

## SUPPLEMENTARY INFORMATION

Targeting Epigenetics non-coding RNA MALAT1/Wnt signaling axis as a therapeutic approach to suppress stemness and metastasis in hepatocellular carcinoma

**Hang-Lung Chang**<sup>1,2†</sup>, **Oluwaseun Adebayo Bamodu**<sup>3,4</sup>, **Jiann-Ruey Ong**<sup>5,6†</sup>, **Wei-Hwa Lee**<sup>7</sup>, **Chi-Tai Yeh**<sup>3,4,8</sup> and **Jo-Ting Tsai**<sup>9,10,11\*</sup>

1. Department of General Surgery, En Chu Kong Hospital, New Taipei City, Taiwan;
2. Department of Health Care Management, Yuanpei University of Medical Technology, Hsinchu, Taiwan;
3. Department of Hematology and Oncology, Cancer Center, Taipei Medical University - Shuang Ho Hospital, New Taipei City, Taiwan;
4. Department of Medical Research and Education, Taipei Medical University - Shuang Ho Hospital, New Taipei City, Taiwan;
5. Department of Emergency Medicine, School of Medicine, Taipei Medical University, Taipei.
6. Department of Emergency Medicine, Shuang-Ho Hospital-Taipei Medical University, New Taipei City.
7. Department of Pathology, Taipei Medical University-Shuang Ho Hospital, New Taipei City, Taiwan.
8. Department of Medical Laboratory Science and Biotechnology, Yuanpei University of Medical Technology, Hsinchu, Taiwan;
9. Department of Radiology, School of Medicine, College of Medicine, Taipei Medical University, Taipei, Taiwan;
10. Department of Radiology, Taipei Medical University - Shuang Ho Hospital, New Taipei City, Taiwan.
11. Graduate Institute of Clinical Medicine, College of Medicine, Taipei Medical University, Taipei City, Taiwan.

† Contributed equally to this work

\*Correspondence: Jo-Ting Tsai, e-mail: 10576@s.tmu.edu.tw; Tel: +886-(2)-2490088 (ext. 8885); Fax: +886-2-2248-0900

**Supplementary Table S1.** Western blot antibodies sheet.

| <b>No.</b> | <b>Target</b>    | <b>Dilution</b> | <b>Catalog</b>                               | <b>kDa</b> |
|------------|------------------|-----------------|----------------------------------------------|------------|
| 1          | CD133            | 1:1000          | #MAB4310                                     | 120        |
| 2          | ALDH1            | 1:1000          | ALDH1A1 (D4R9V) Rabbit mAb #12035            | 55         |
| 3          | $\beta$ -catenin | 1:1000          | $\beta$ -Catenin (6B3) Rabbit mAb #9582P     | 92         |
| 4          | GAPDH            | 1:1000          | GAPDH Antibody (0411) (sc-47724)             | 37         |
| 5          | P-Stat3          | 1:1000          | Phospho-Stat3 (Tyr705) (D3A7) XP® Rabbit mAb | 79,86      |
| 6          | Stat3            | 1:1000          | Stat3 (79D7) Rabbit mAb #4904                | 79,86      |
| 7          | c-Myc            | 1:500           | c-Myc Antibody (9E10) (sc-40)                | 55         |
| 8          | CK19             | 1:1000          | CK19 monoclonal antibody SAB3300019          | 43.9       |
| 9          | Vimentin         | 1:1000          | Anti-Vimentin antibody (ab137321)            | 57         |
| 10         | Twist1           | 1:1000          | Twist (Twist2C1a) Antibody sc-81417          | 28         |
| 11         | Cyclin D1        | 1:1000          | Cyclin D1 Antibody (A-12) (sc-8396)          | 38         |
| 12         | Axin2            | 1:1000          | Axin2 Antibody SAB3500619                    | 93         |
| 13         | LEF1             | 1:1000          | LEF1 (C12A5) Rabbit mAb #2230                | 25~58      |
| 14         | DKK1             | 1:1000          | DKK1 Antibody #4687                          | 30,35      |
| 15         | $\beta$ -actin   | 1:10000         | $\beta$ -Actin (8H10D10) Mouse mAb #3700     | 42         |

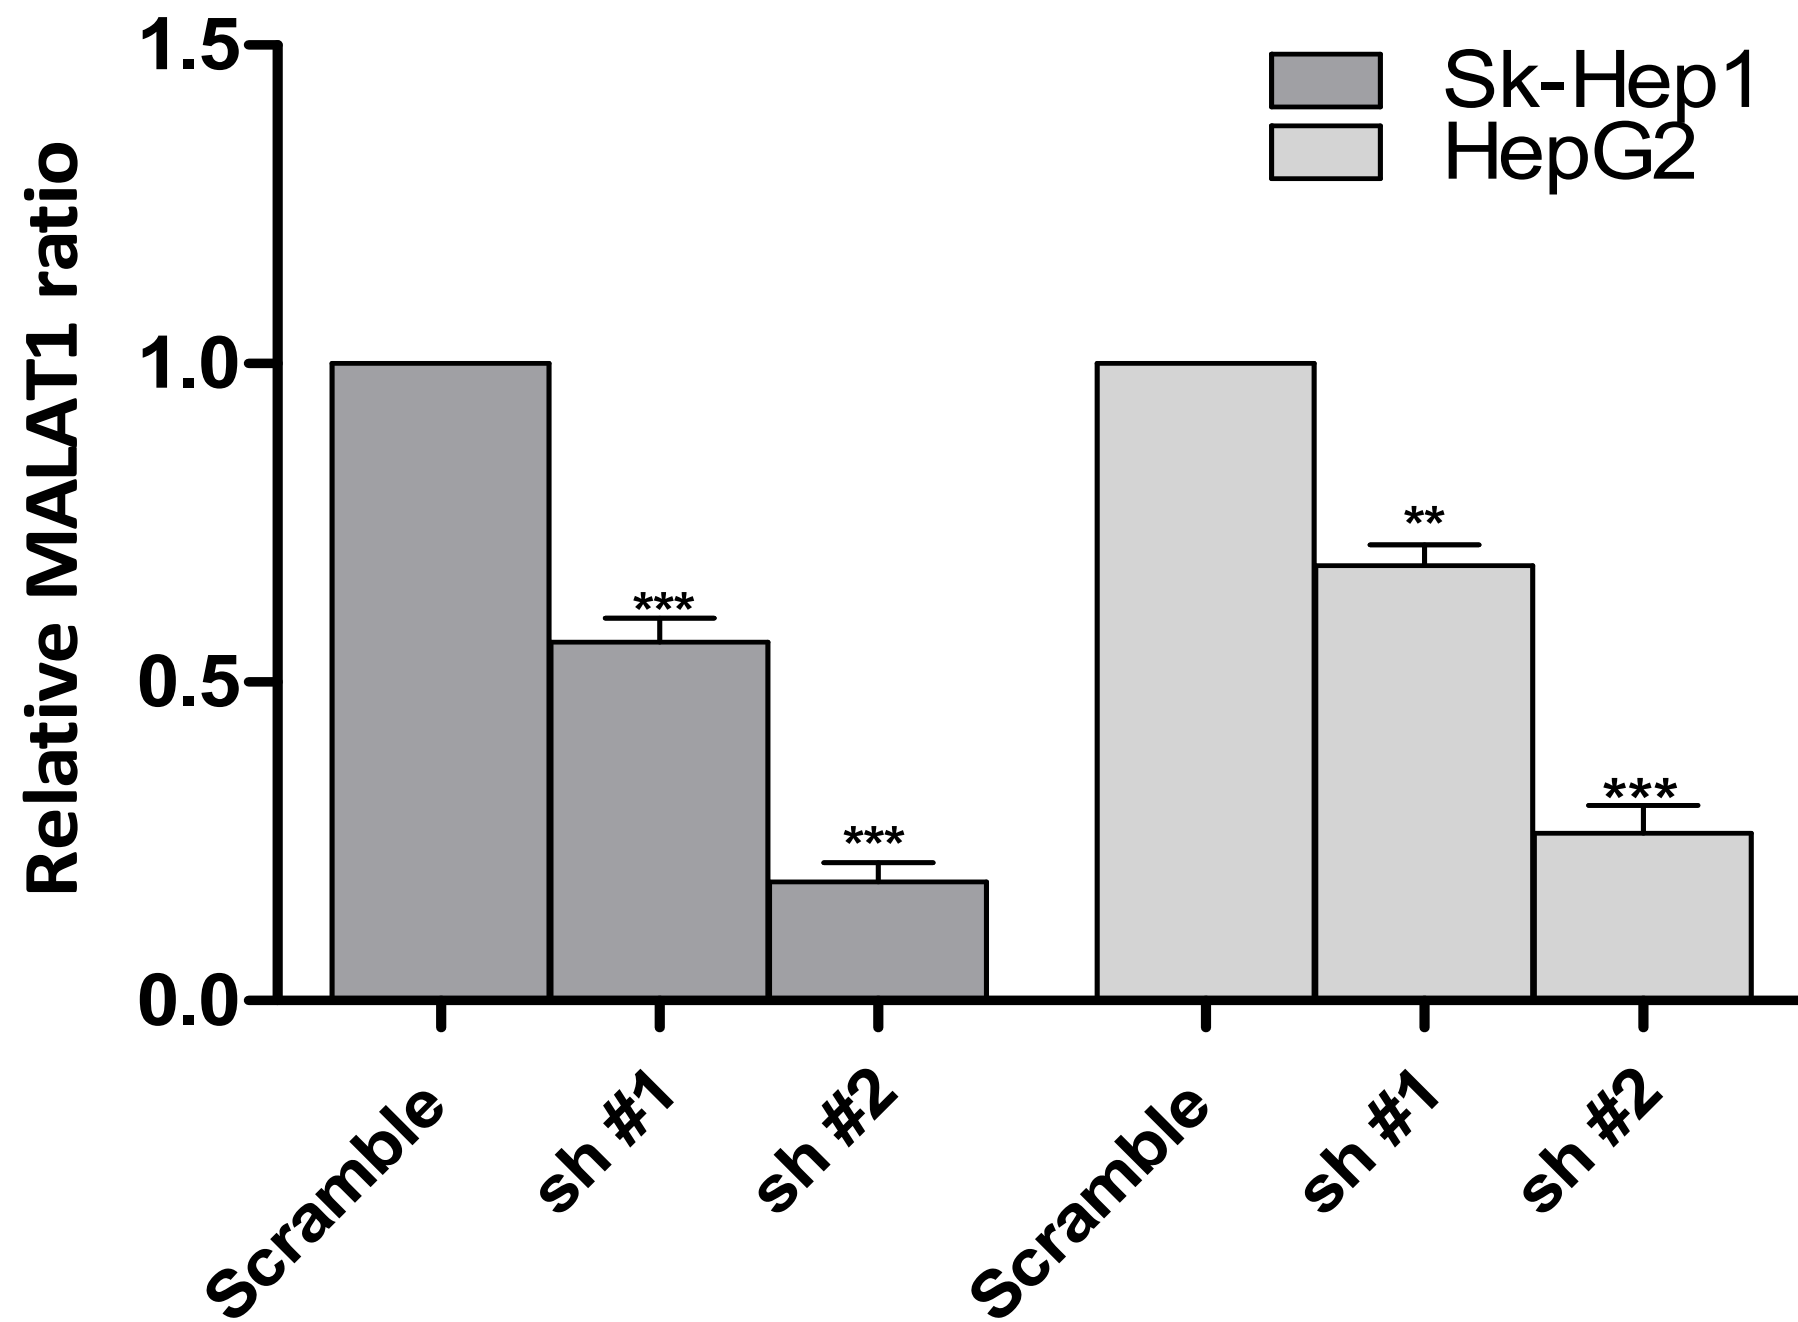

Supplementary Figure S1

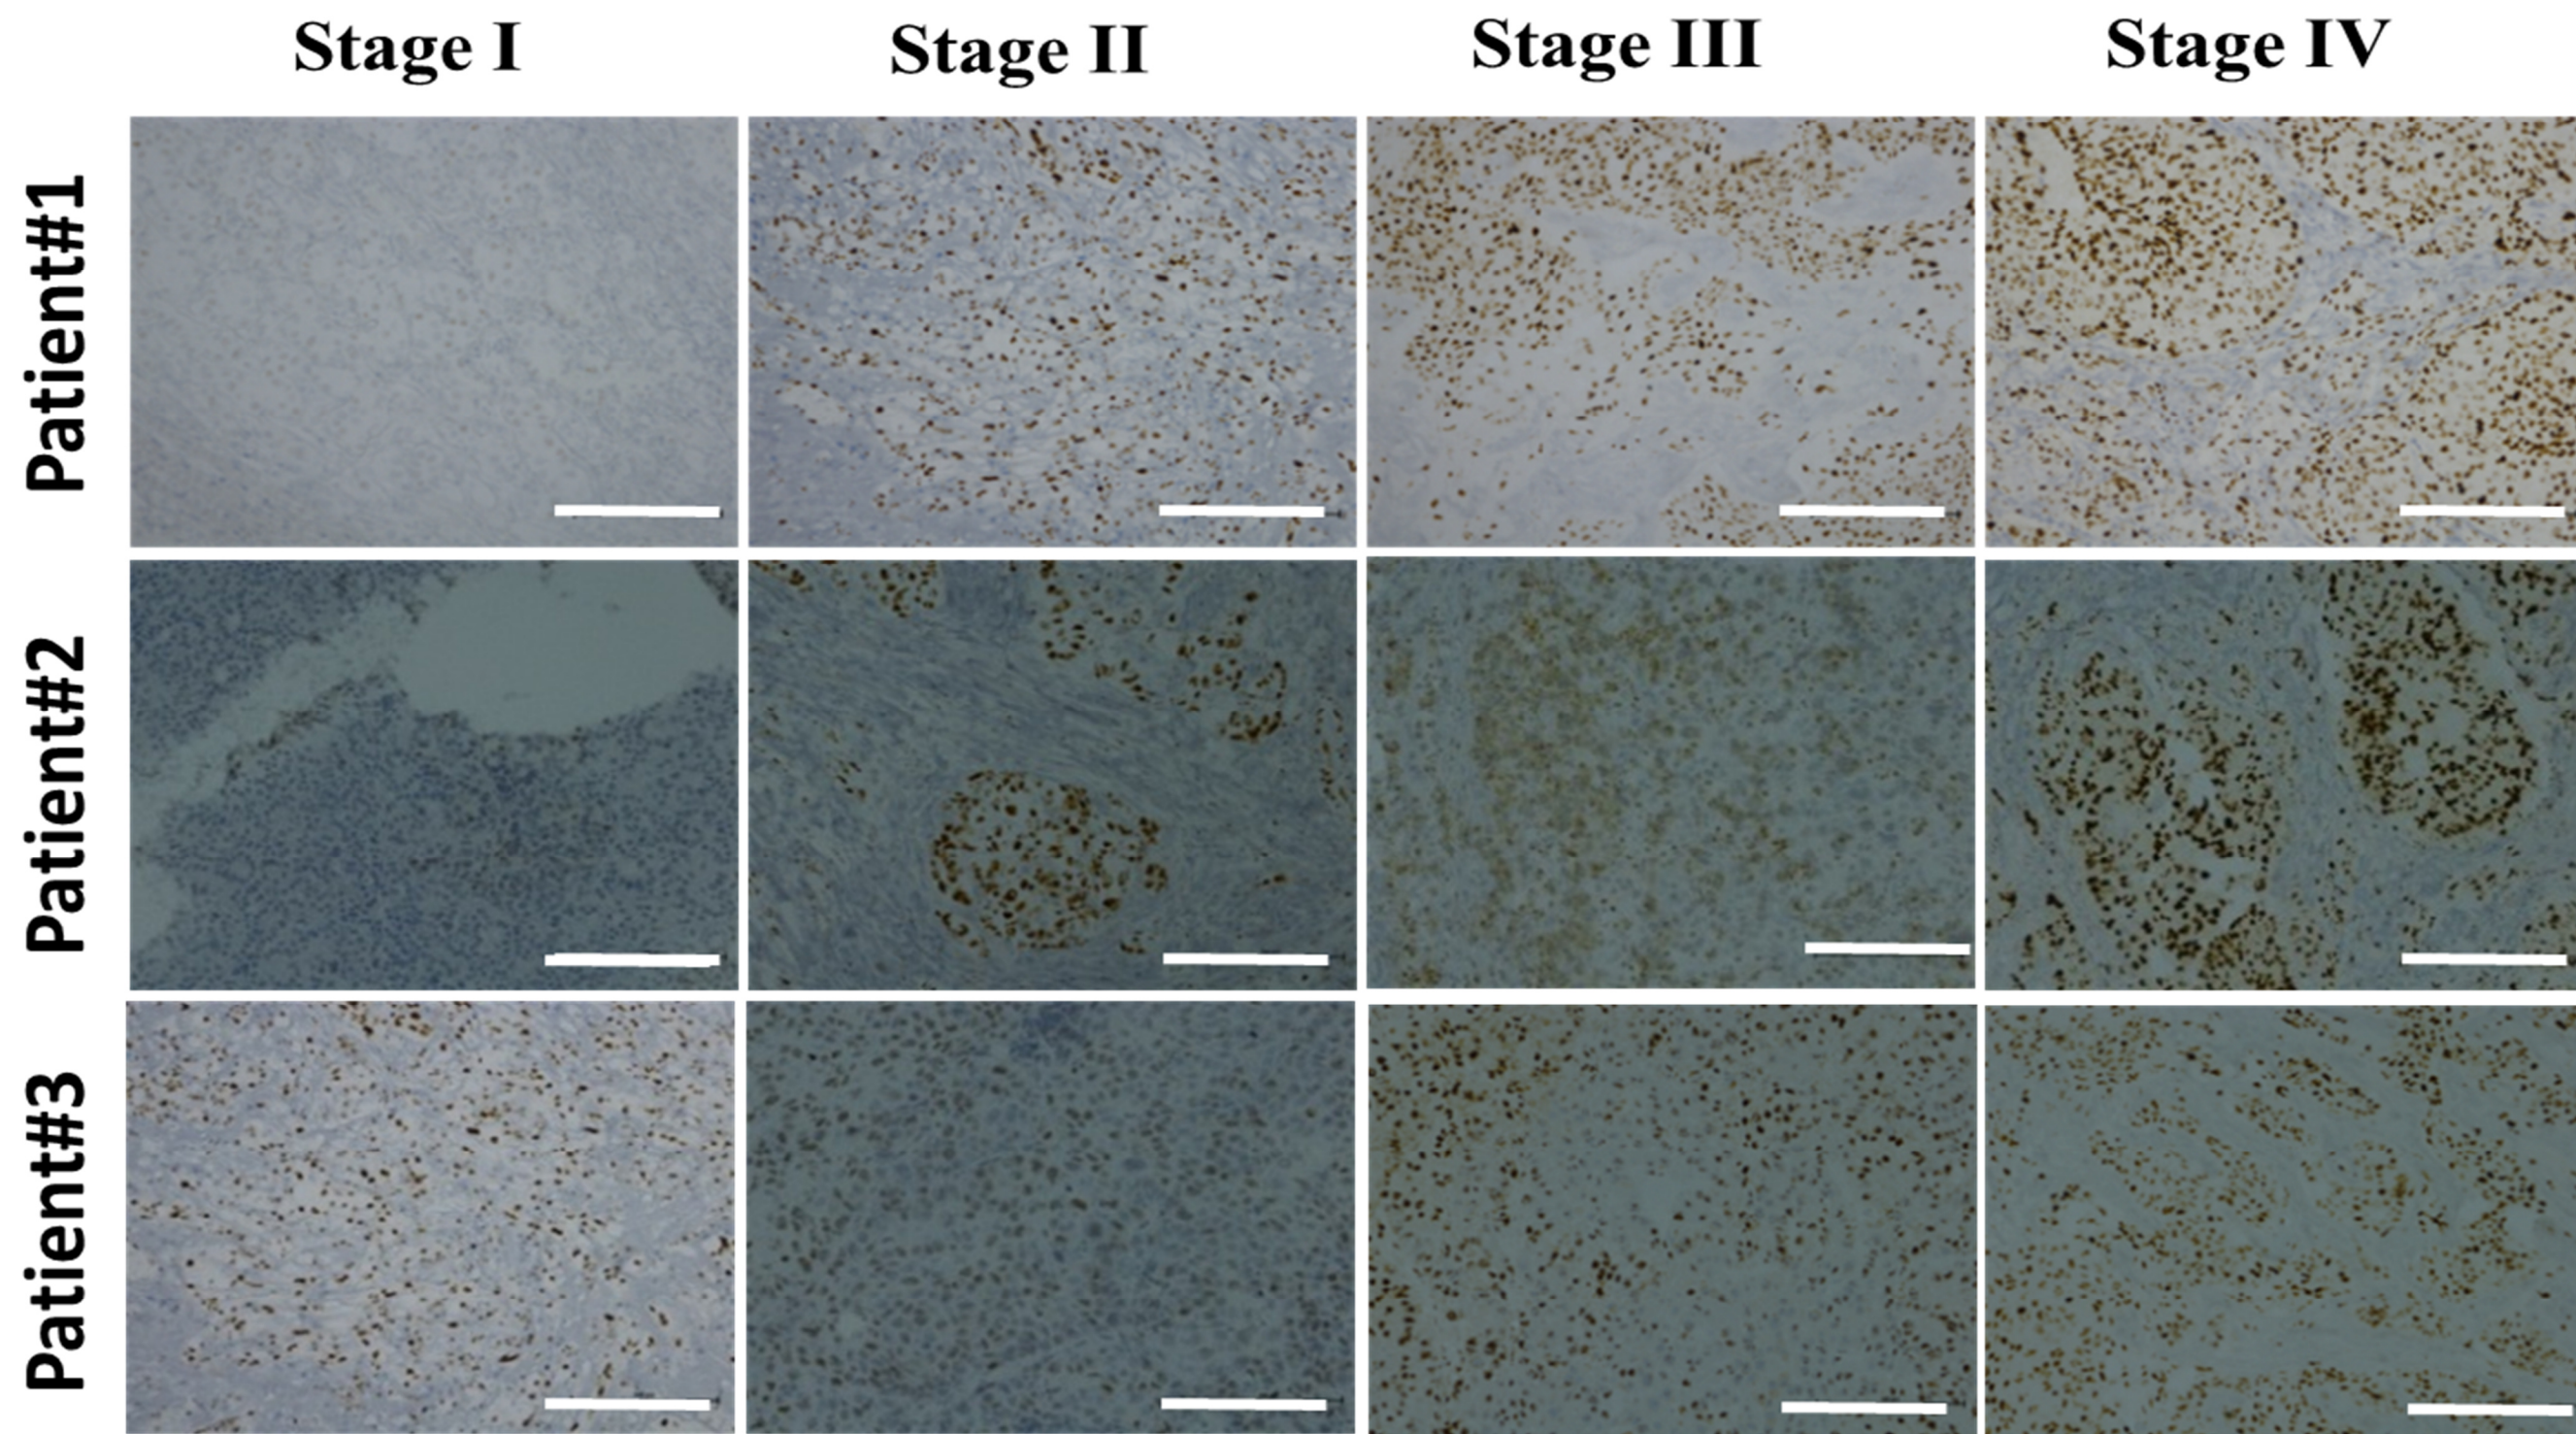

Supplementary Figure S2

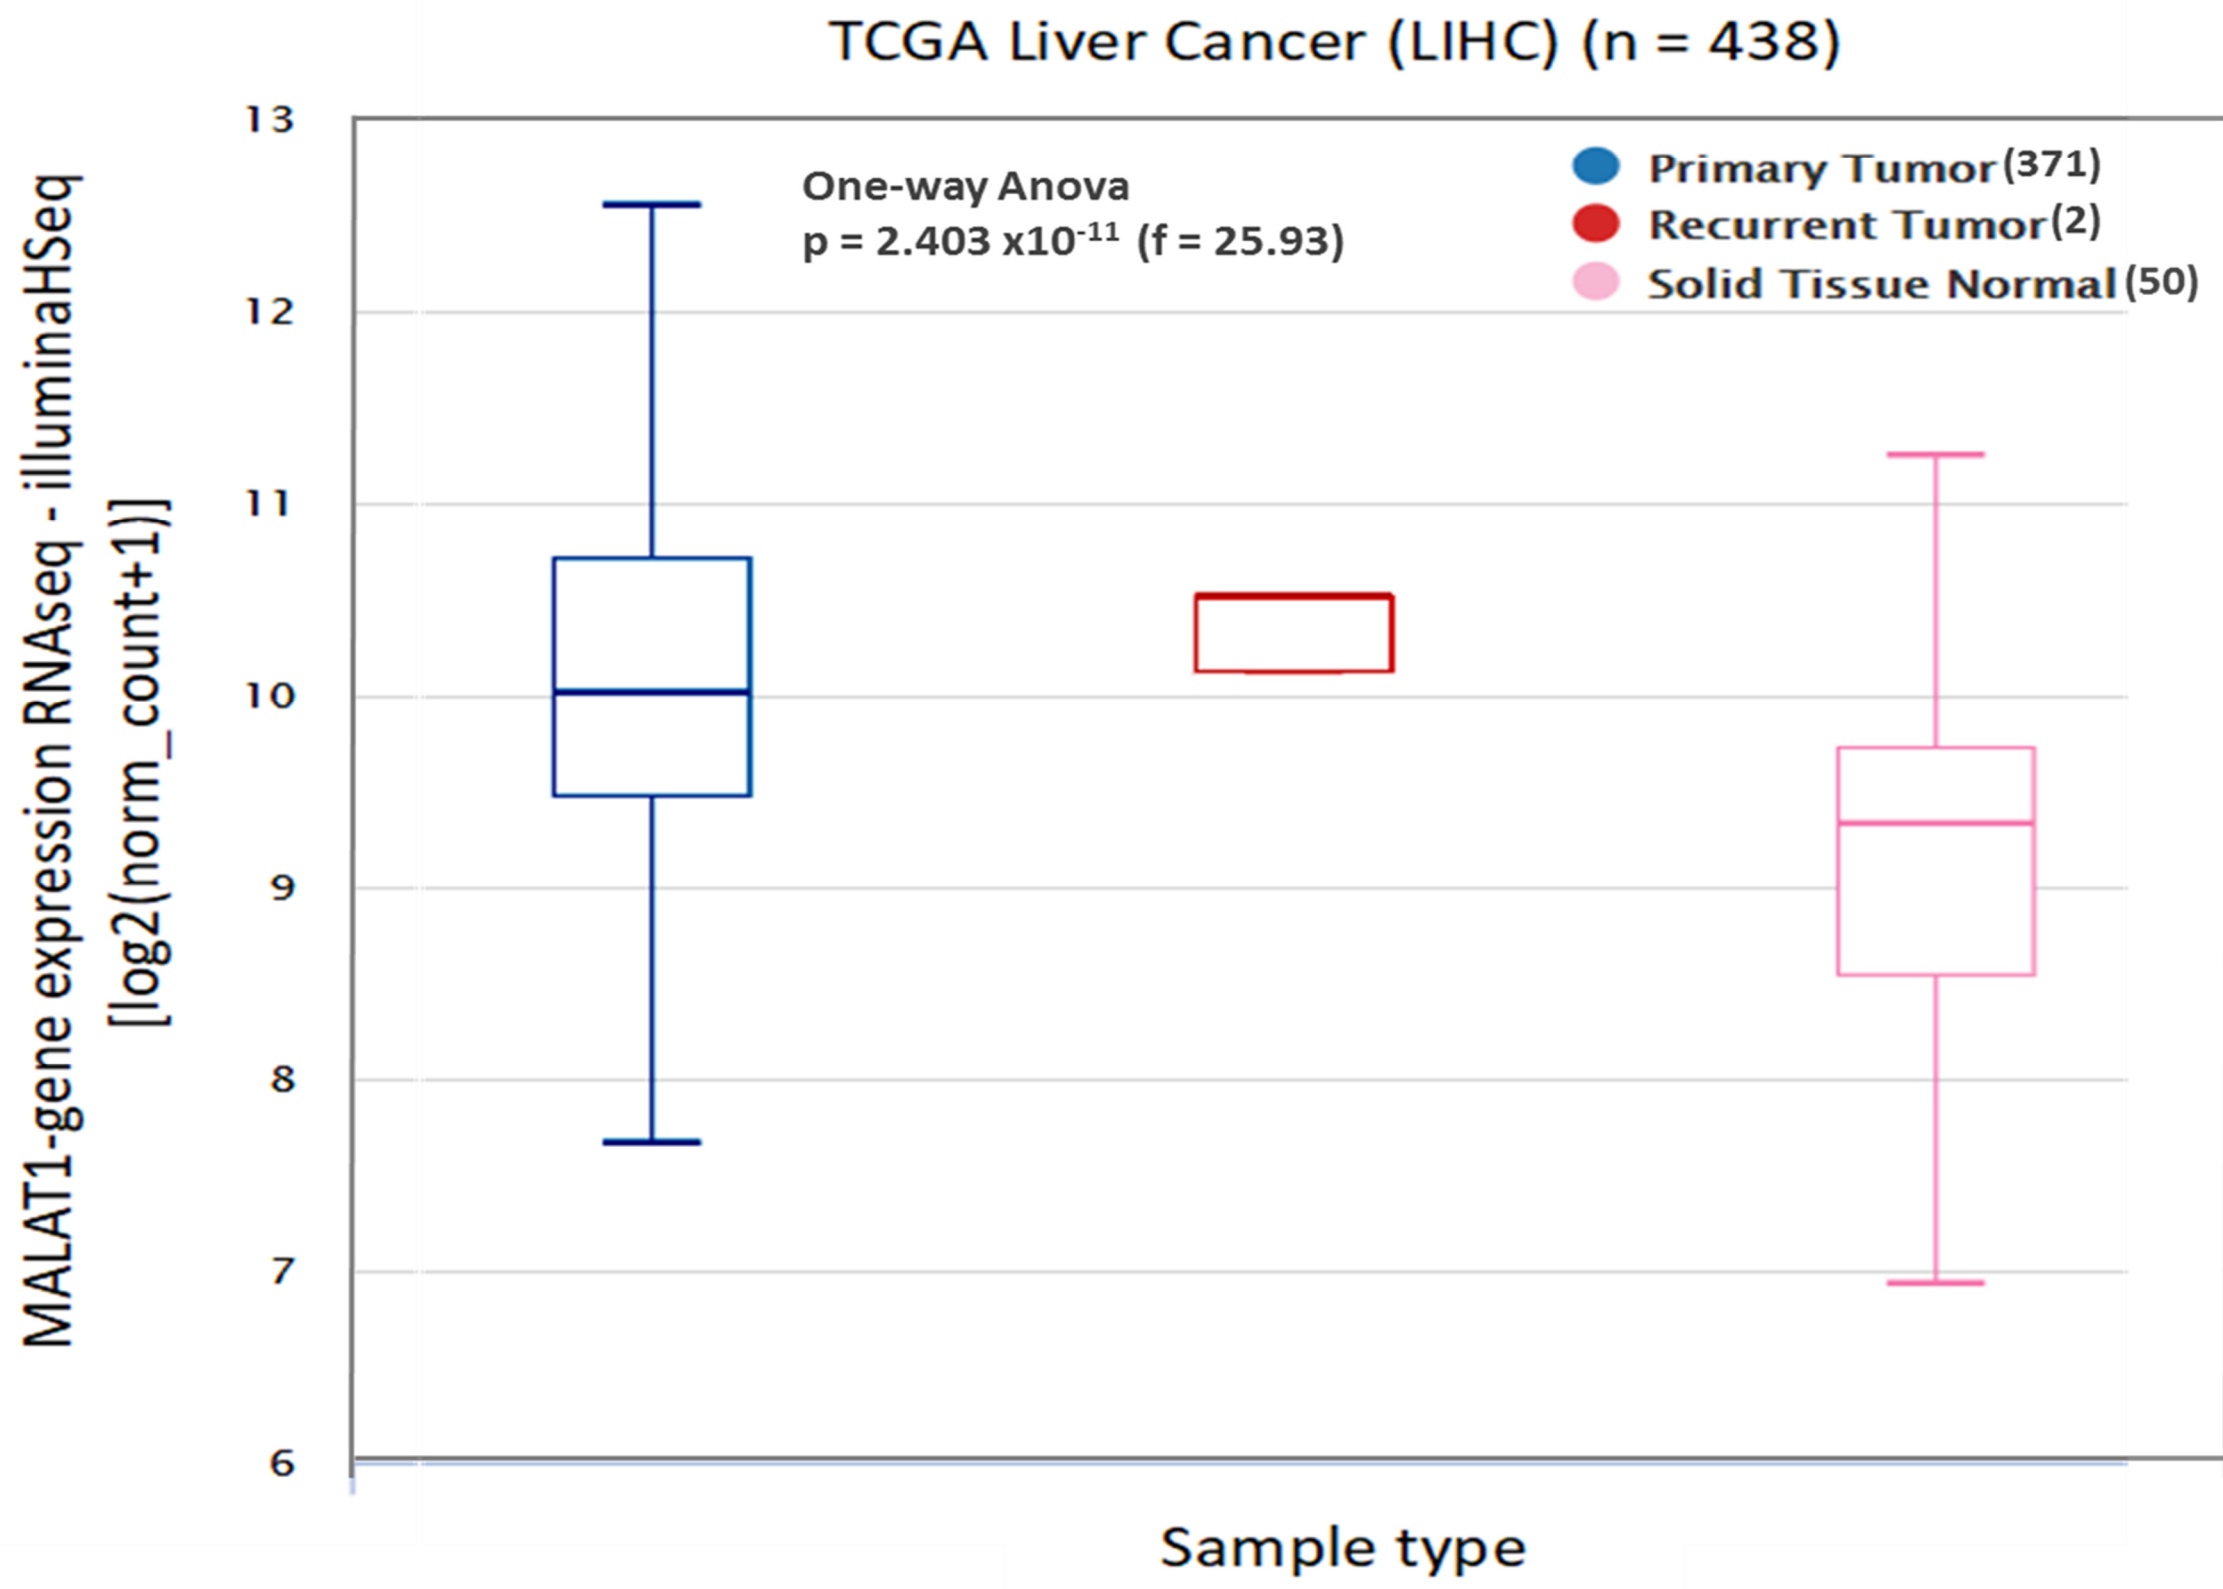

Supplementary Figure S3

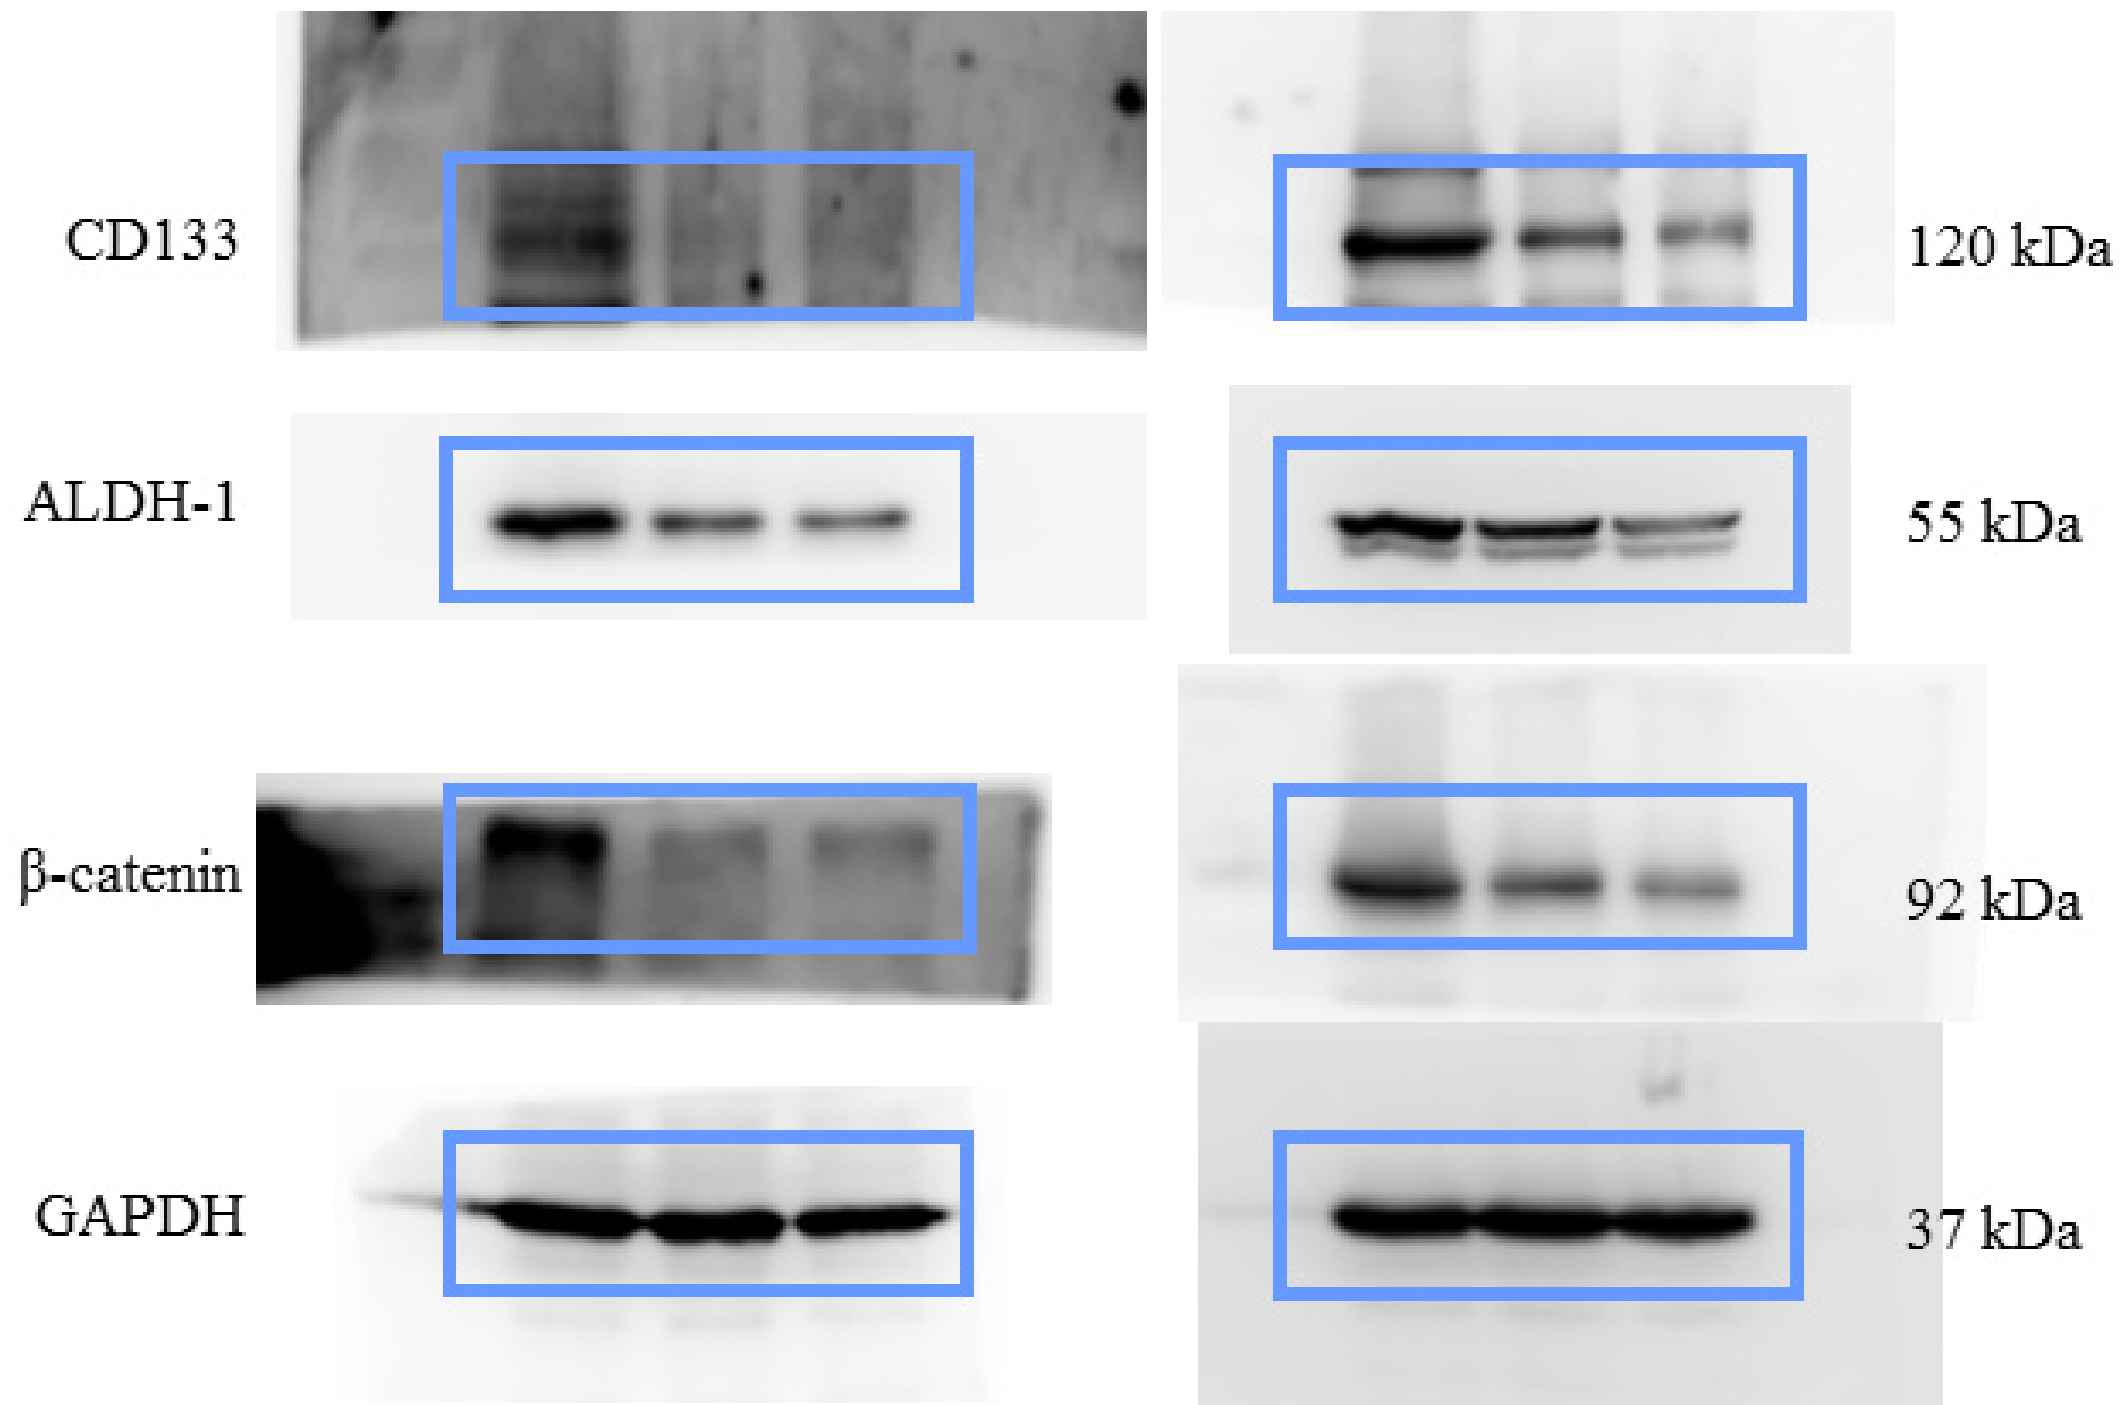

**Supplementary Figure S4.** Full-size blots of Figure 3B

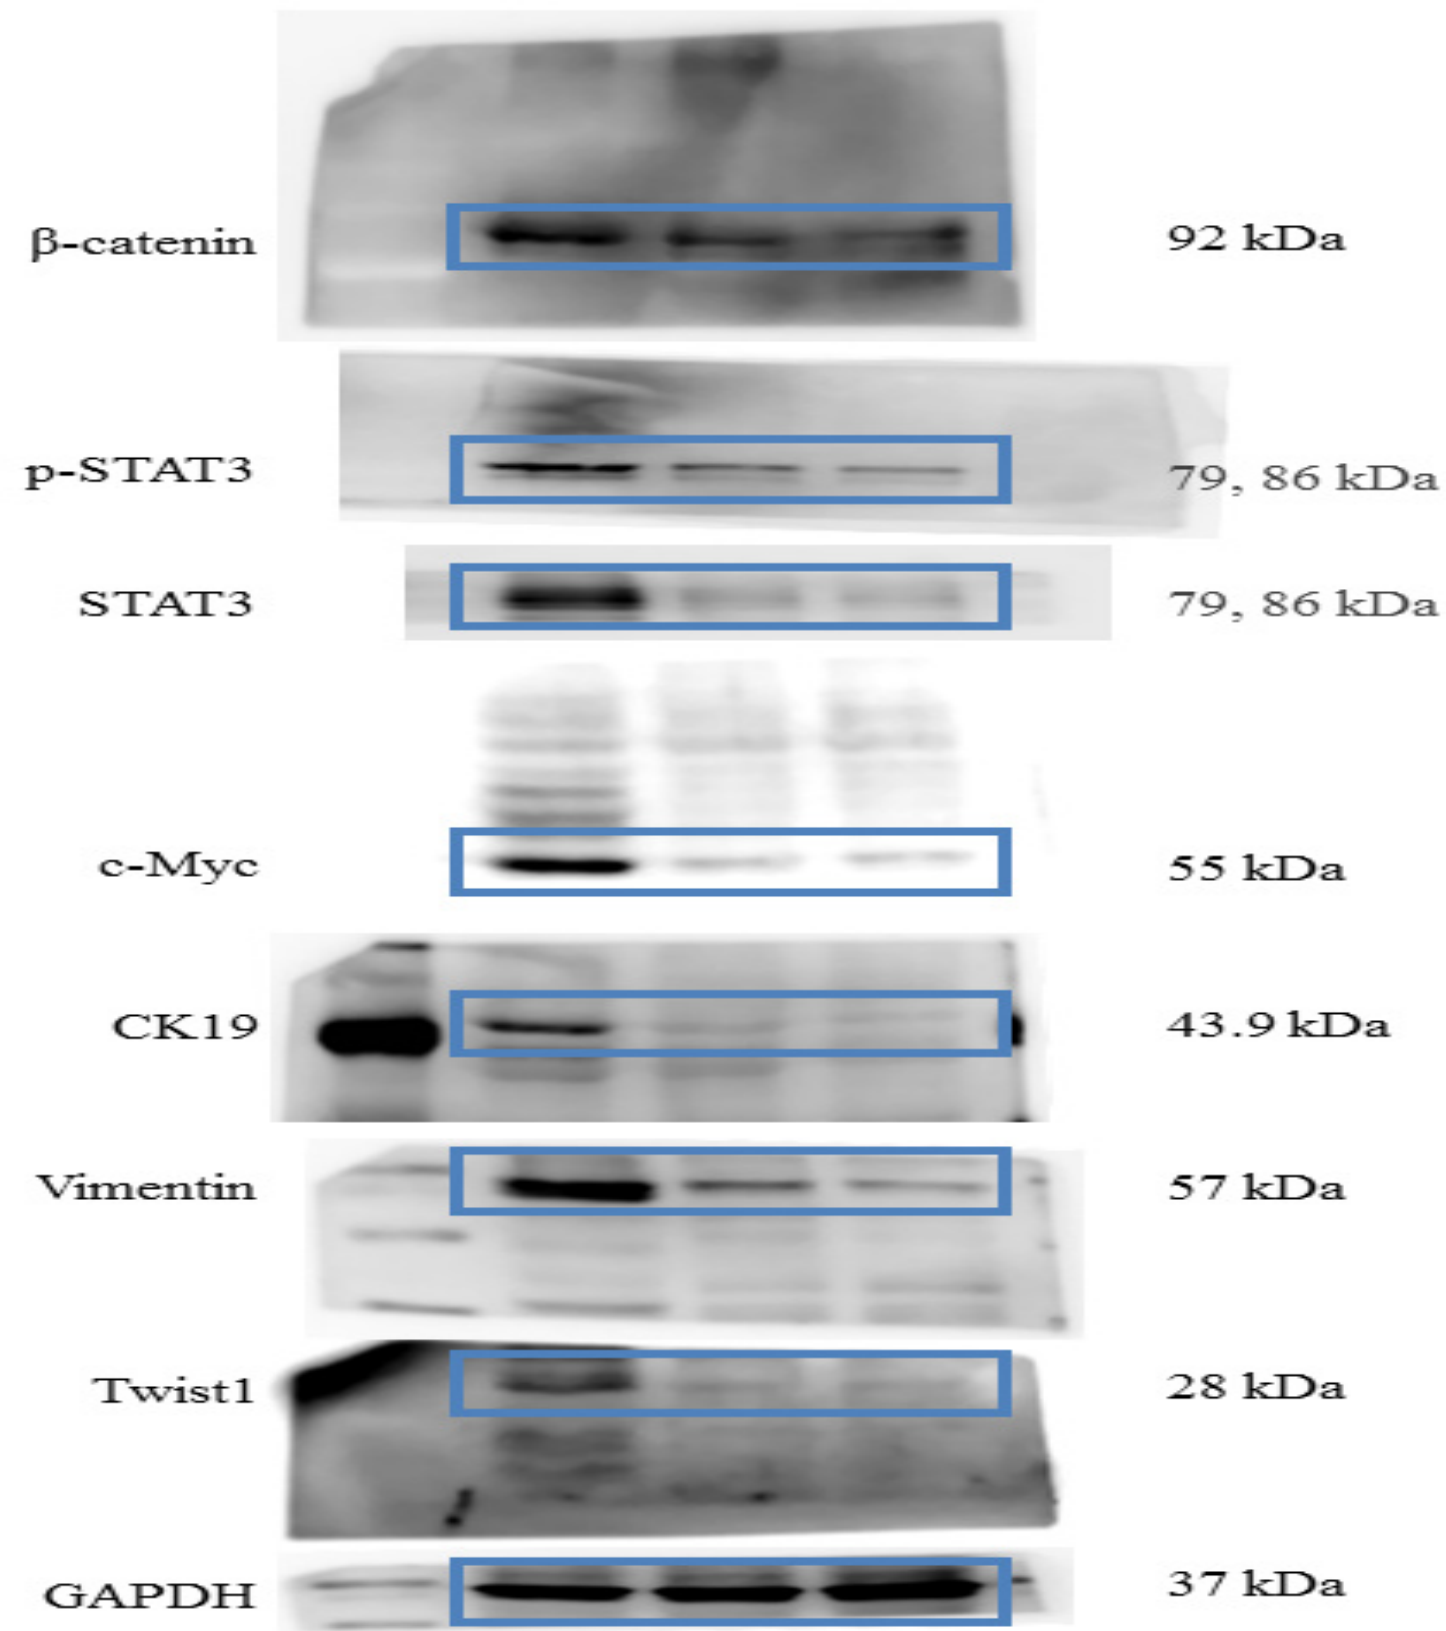

**Supplementary Figure S5.** Full-size blots of Figure 3D

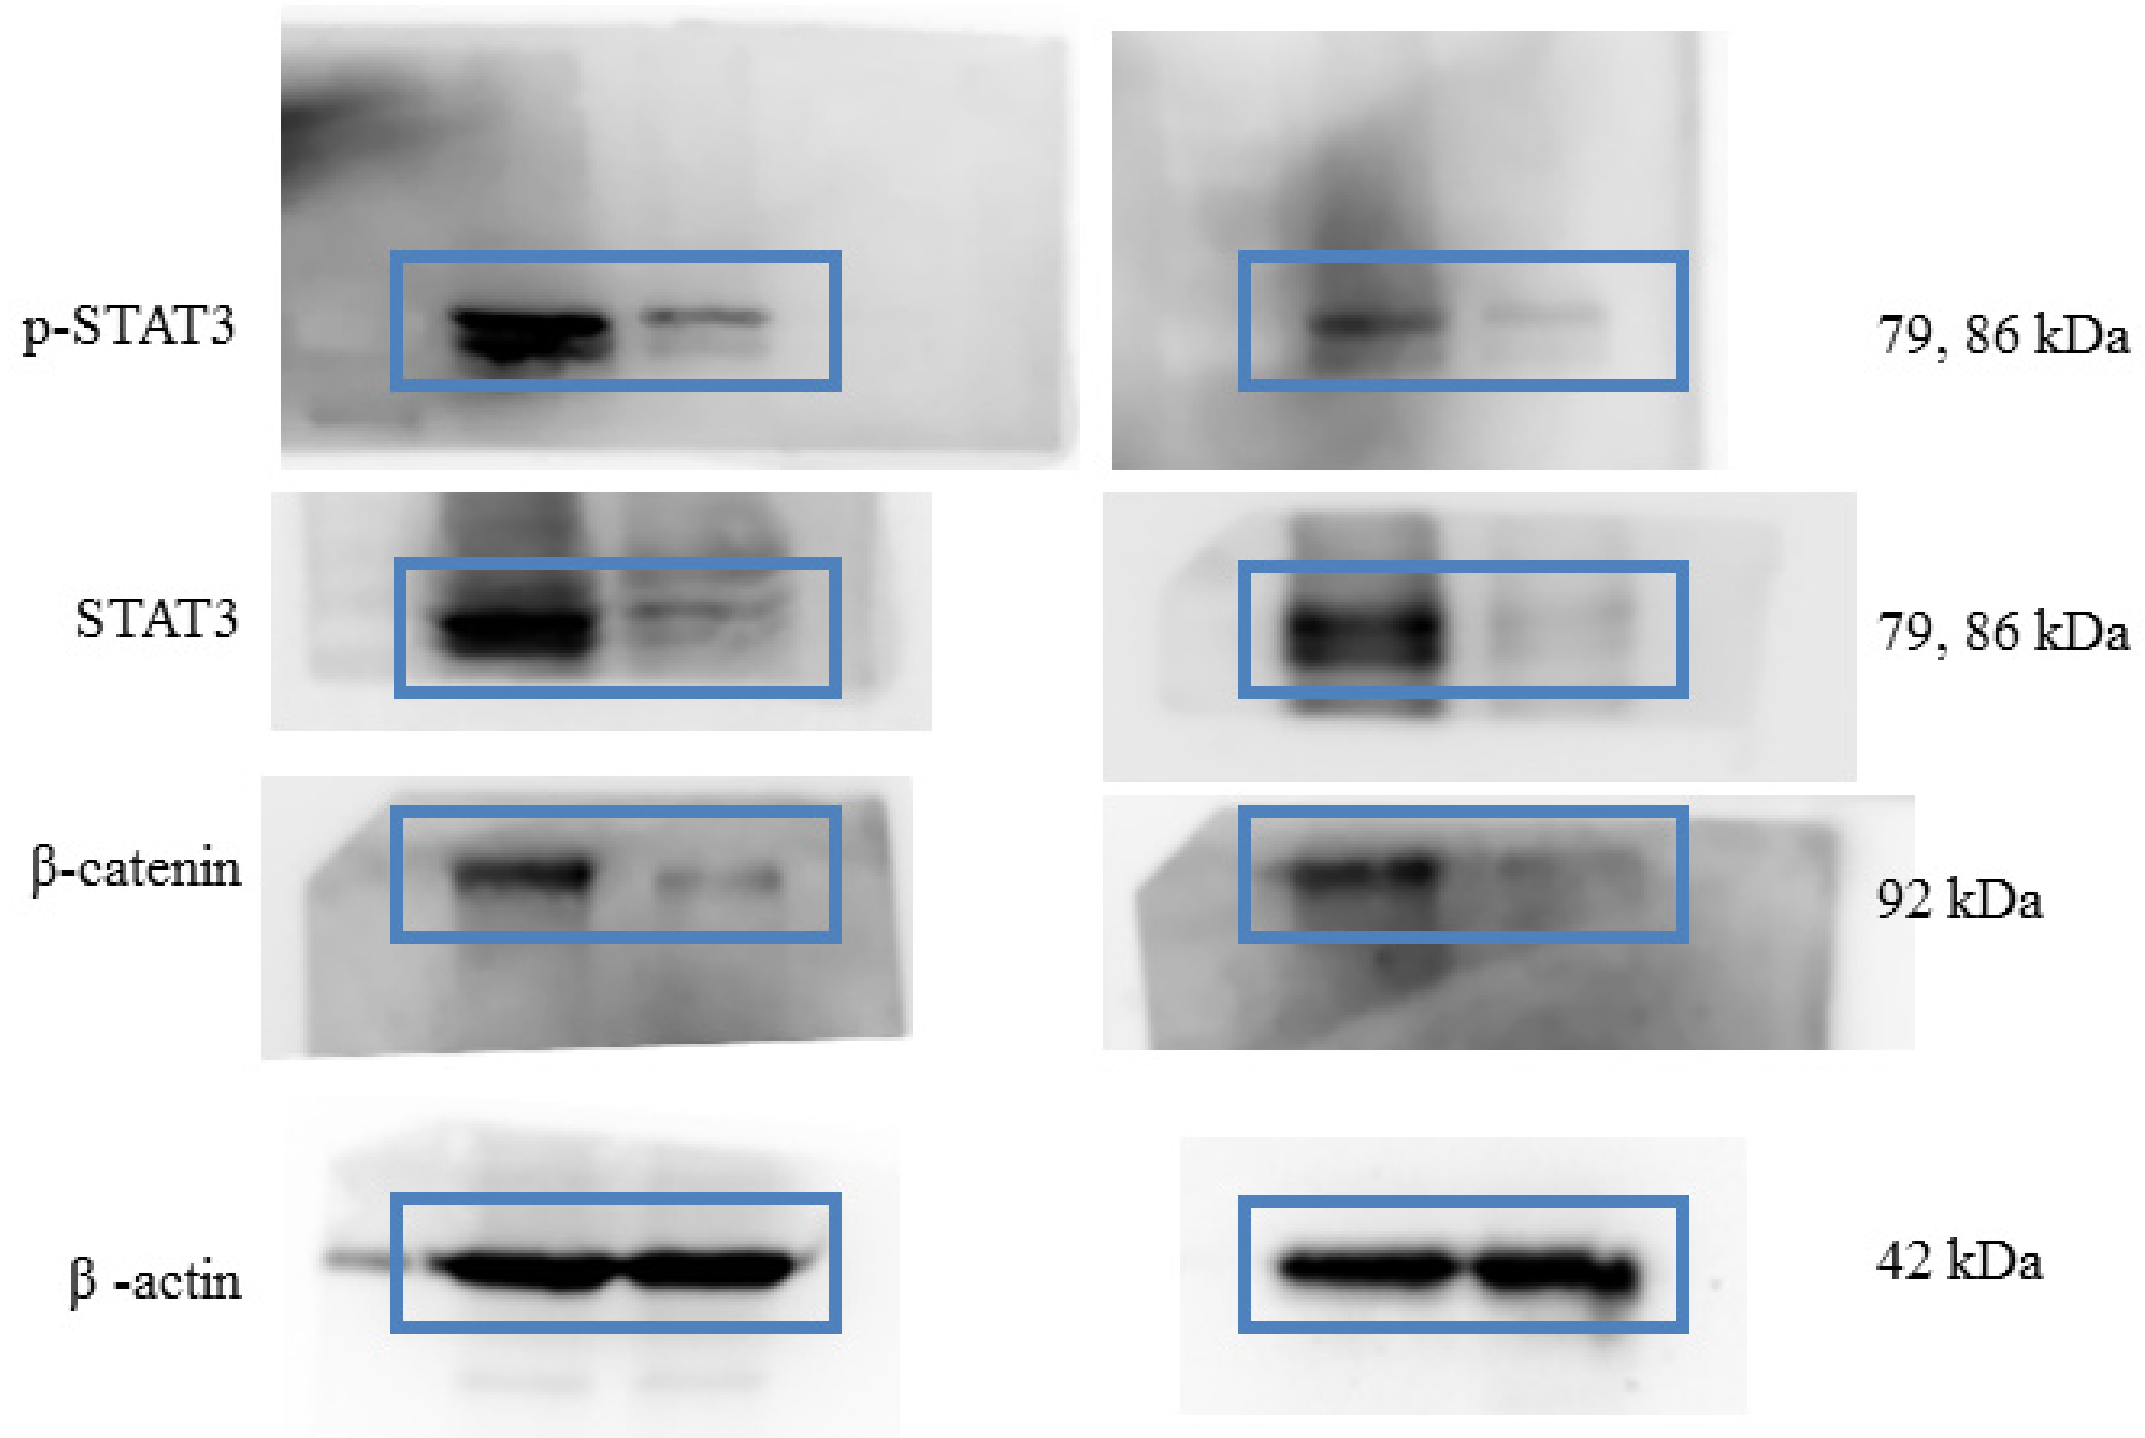

**Supplementary Figure S6.** Full-size blots of Figure 4C



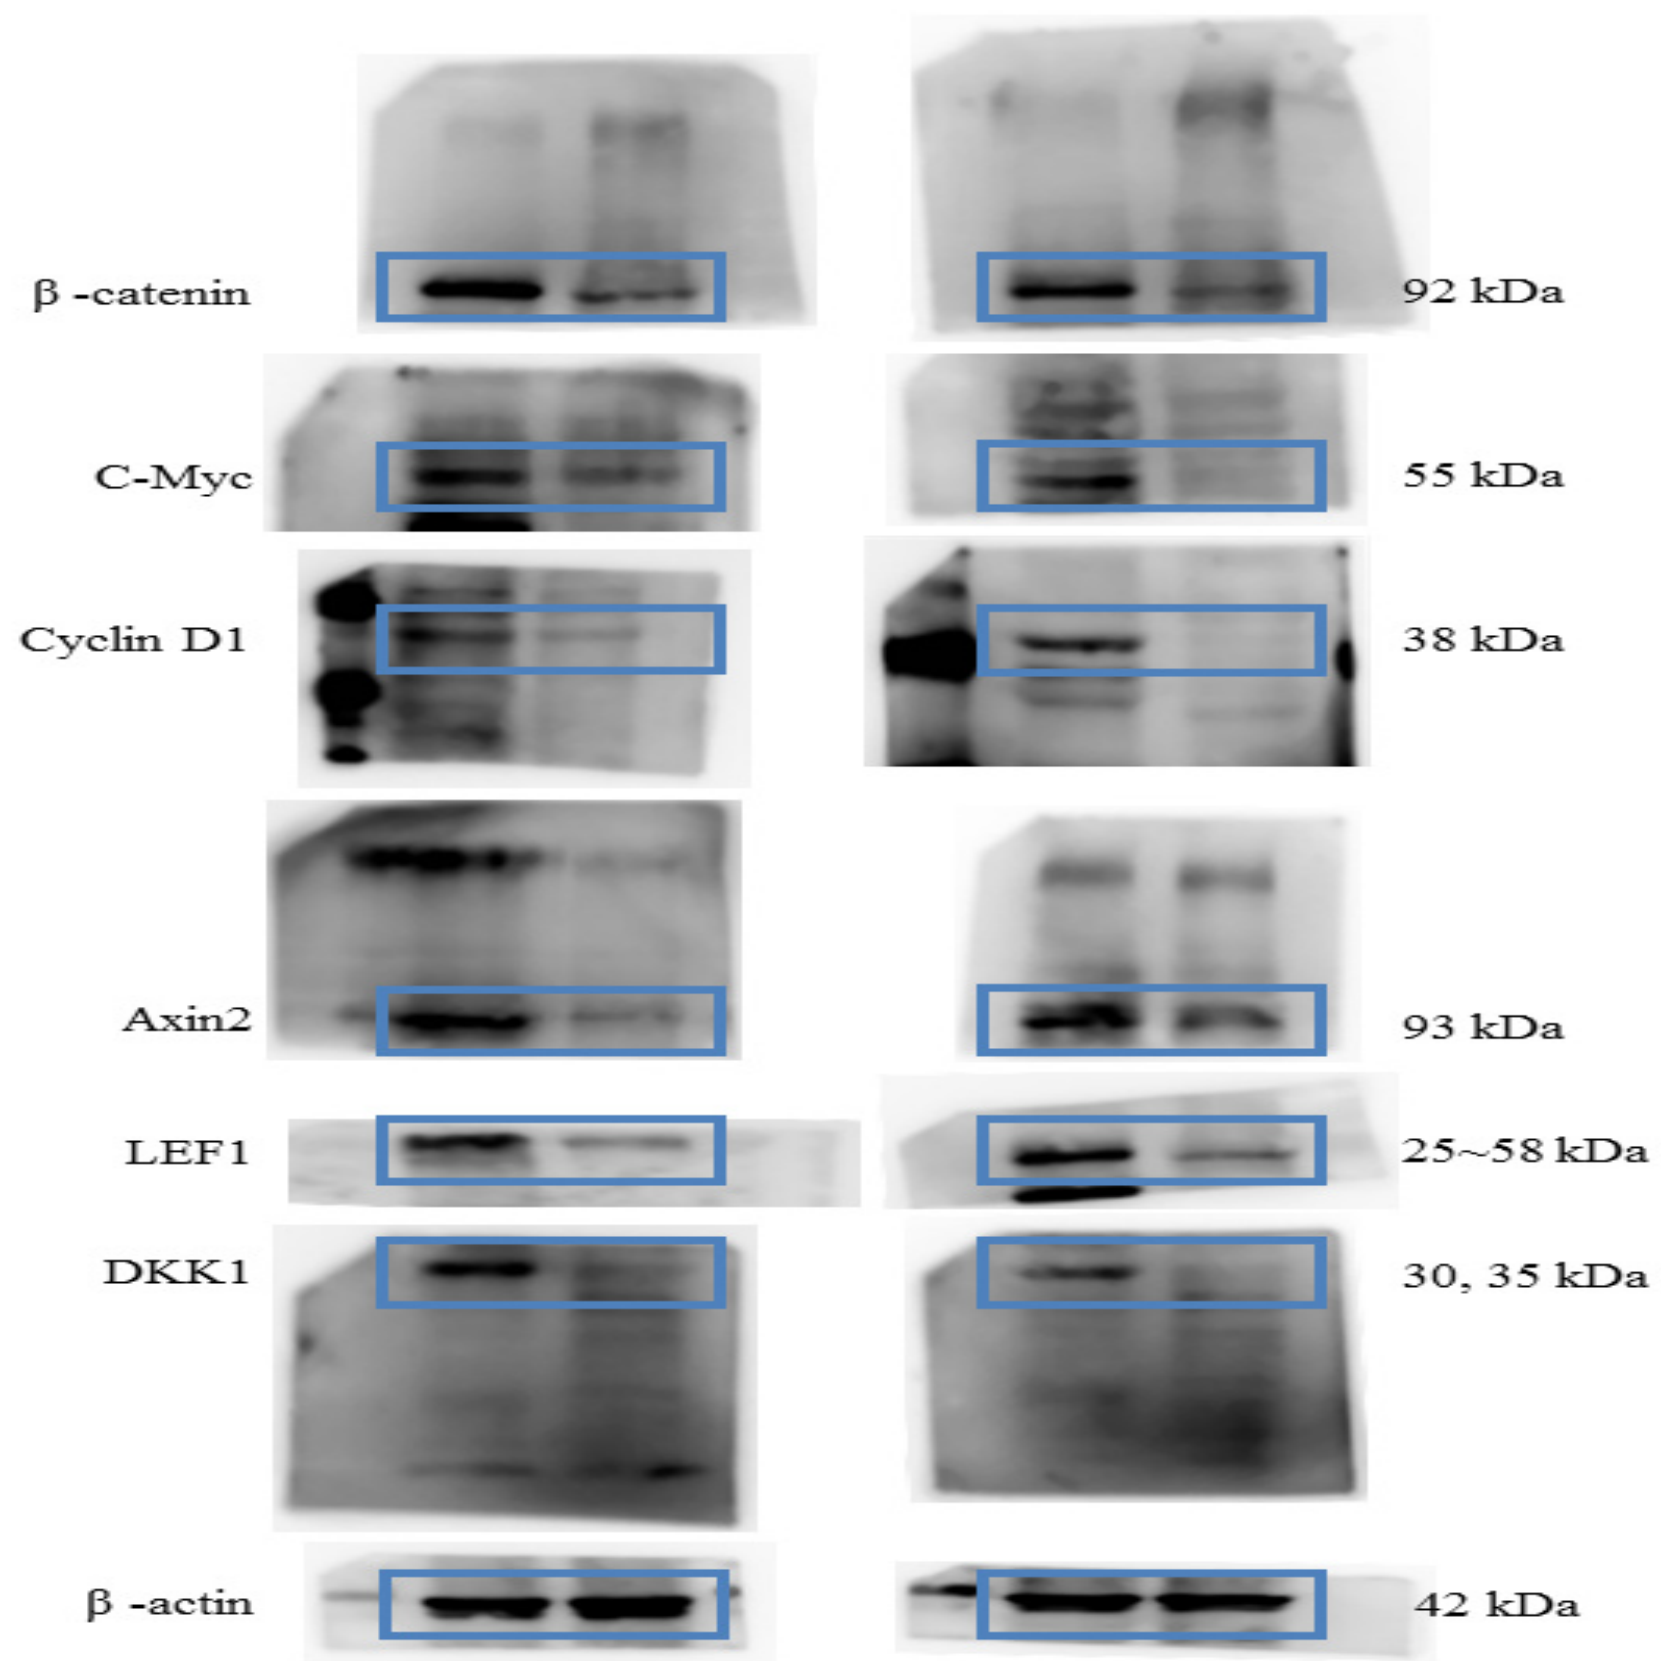

**Supplementary Figure S7.** Full-size blots of Figure 4D
